# Supplementary material for: Evi1 Counteracts Anti-Leukemic and Stem Cell Inhibitory Effects of All-Trans Retinoic Acid on Flt3-ITD/Npm1c-Driven Acute Myeloid Leukemia Cells
Source: PubMed Central journal article supplement (PMC7600968; doi:10.3390/biomedicines8100385), 2020-09-28
Supplement: biomedicines-08-00385-s001.pdf [file biomedicines-08-00385-s001.pdf]

Supplemental Figures to manuscript “*Evi1* counteracts anti-leukemic and stem cell inhibitory effects of *all-trans* retinoic acid on *Flt3*-ITD/*Npm1c*-driven acute myeloid leukemia cells” by Nguyen et al.

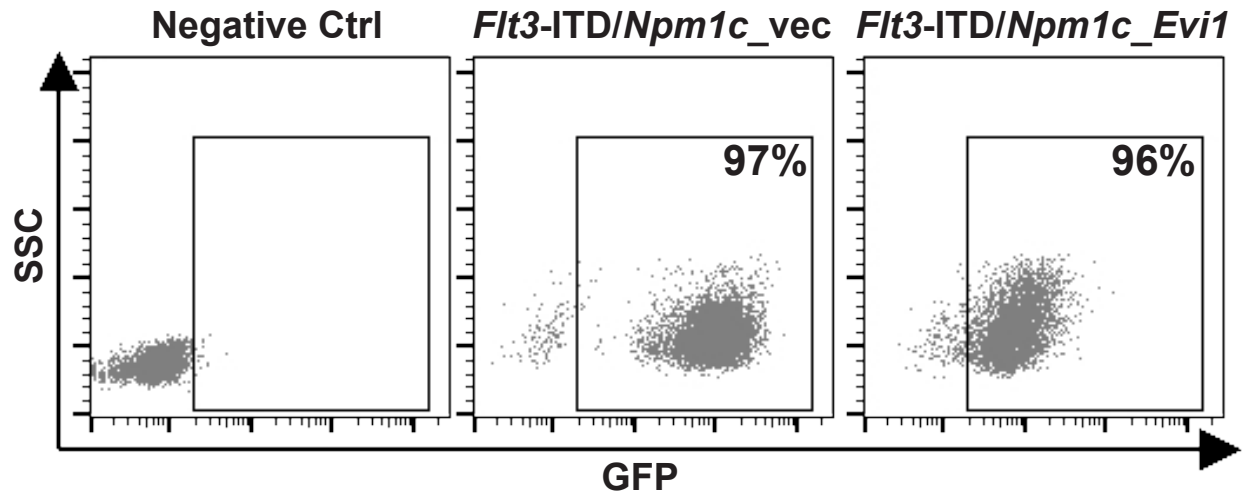

Figure S1. Proportion of GFP positive cells among LC<sup>*Flt3*-ITD/*Npm1c*</sup> transduced with empty vector (*Flt3*-ITD/*Npm1c*\_vec) or with pMSCV\_FLAG-*Evi1*\_IRES\_GFP (*Flt3*-ITD/*Npm1c*\_Evi1). Representative flow cytometric analysis performed after sorting. SSC, side scatter. As negative control (Ctrl), a cell line established from primary murine AML cells (RN2) was used.

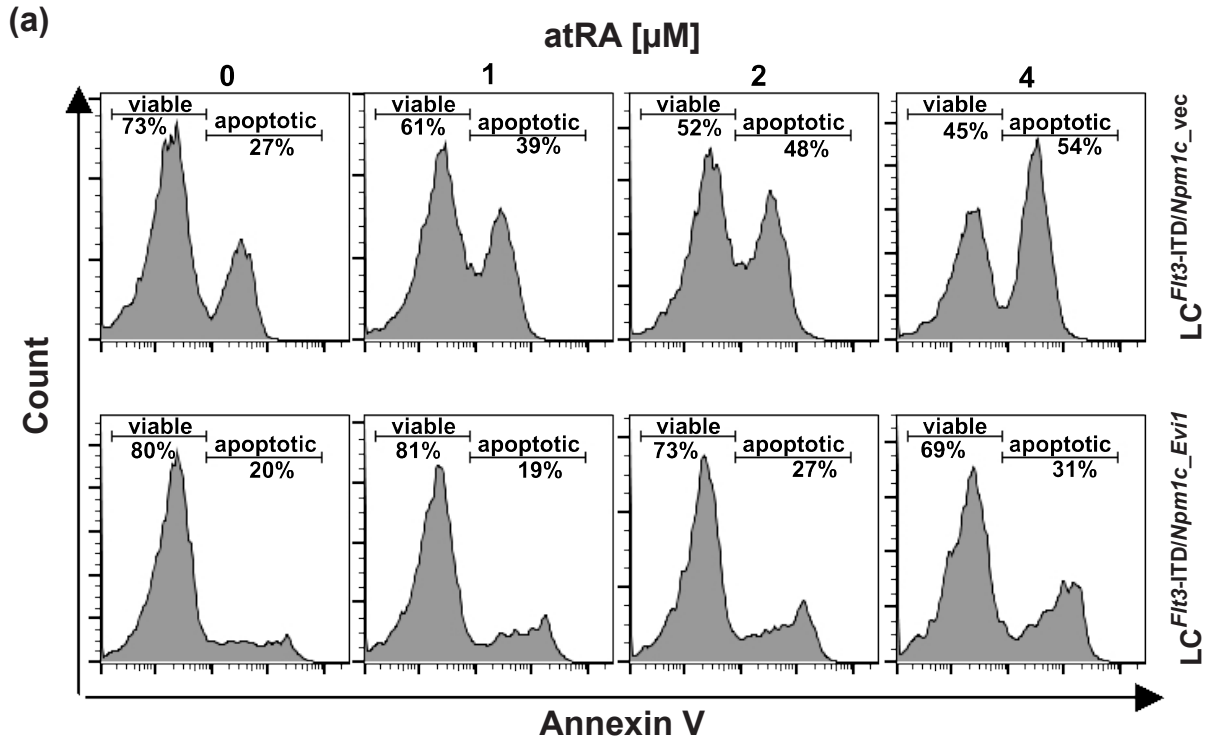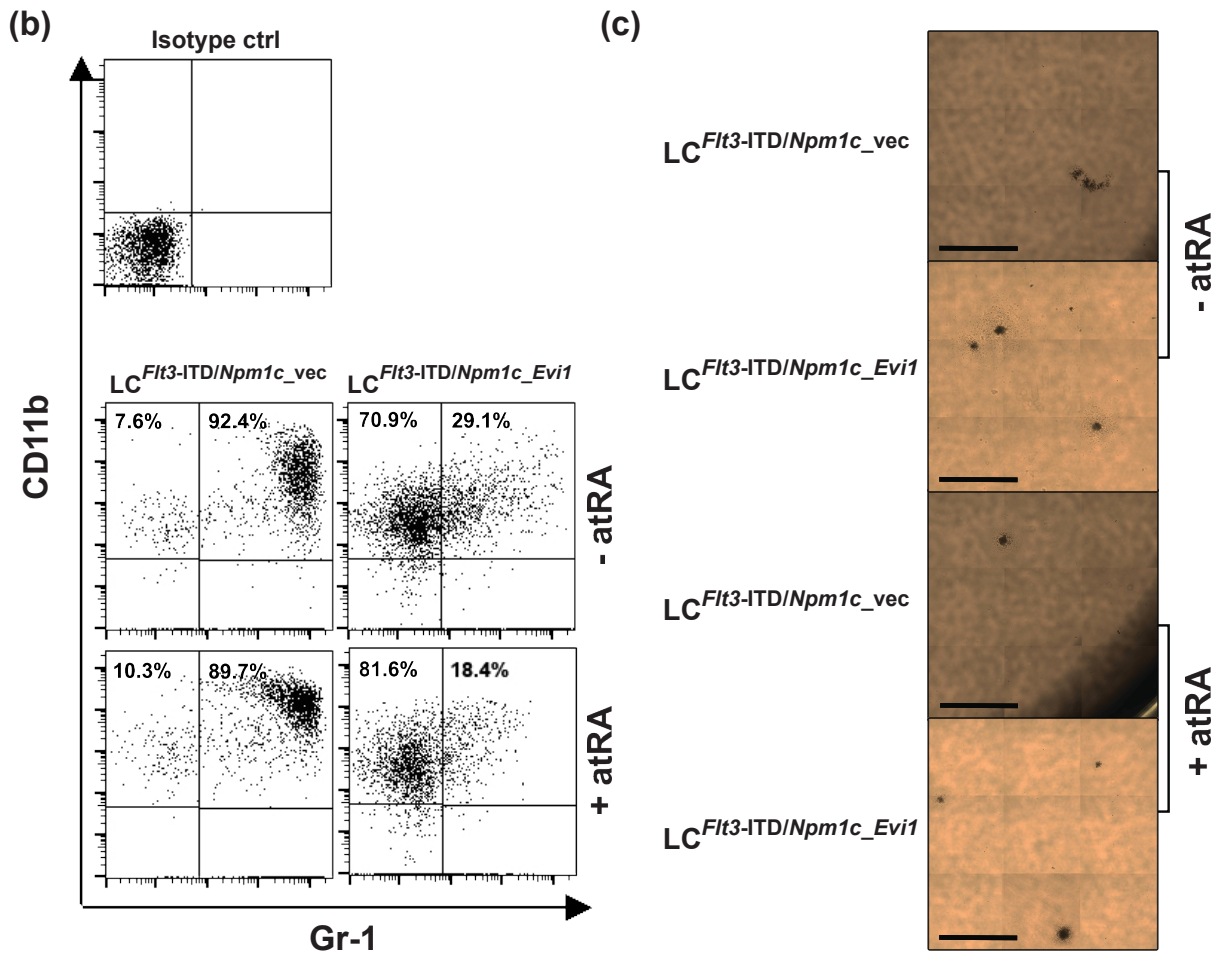

**Figure S2. Experimental expression of *Evi1* counteracts the anti-leukemic and stem cell inhibitory effects of atRA on *Flt3*-ITD/*Npm1c* driven murine AML cells.** Bone marrow LC<sup>*Flt3*-ITD/*Npm1c*\_vec</sup> and LC<sup>*Flt3*-ITD/*Npm1c*\_Evi1</sup> were treated with the indicated concentrations of atRA or with solvent for 48 h (a), or with 1 μM atRA or the corresponding amount of solvent for 72 h (b, c). (a) Apoptosis. Representative flow cytometric analysis of Annexin V stained cells. Annexin V negative and positive cells were considered as viable and apoptotic, respectively. (b) Myeloid differentiation. Representative flow cytometric analyses of Gr1<sup>+</sup> cells among CD11b<sup>+</sup> GFP<sup>+</sup> cells. Pre-gating on the GFP positive population restricted the analysis to leukemic cells. Cut-offs for marker positivity were determined using isotype control antibodies. (c) Serial replating assay. Representative images of colonies from second plating. Scale bars, 2mm. Images were taken using TissueFAXS i PLUS (TissueGnostics, Vienna, Austria) and TissueFAXS v.4.2 software.
